# Supplementary material for: HDAC6 selective inhibition of melanoma patient T-cells augments anti-tumor characteristics
Source: PubMed Central journal article supplement (PMC6366050; doi:10.1186/s40425-019-0517-0), 2019-02-06
Supplement: 40425_2019_517_MOESM2_ESM.pdf [file 40425_2019_517_MOESM2_ESM.pdf]

1 **Supplemental Figure 1.**

2

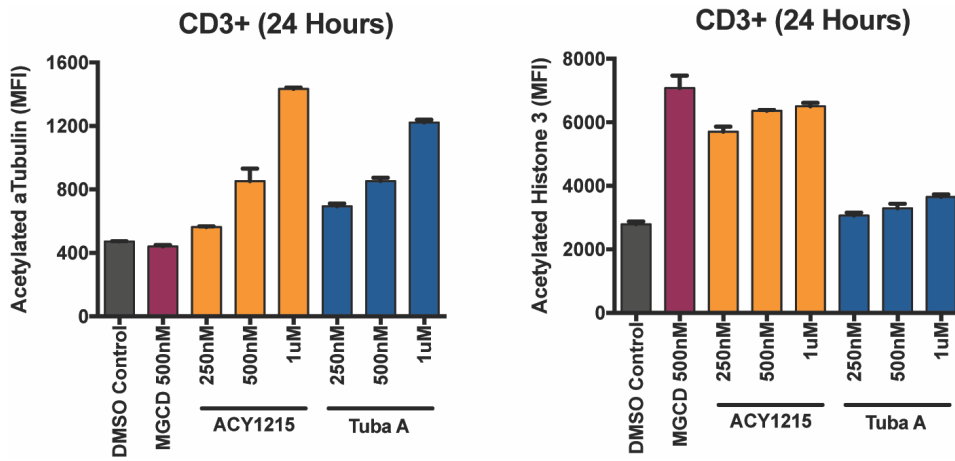

3

4

5 **Supplemental Figure 1. Impact of HDAC inhibitors on protein acetylation.** PBMC from melanoma patients  
6 were cultured with the indicated inhibitor and concentration for 24 hours. Levels of acetylated  $\alpha$ -tubulin and  
7 acetylated histone 3 were assessed in CD3+ T-cells by flow cytometry. Representative data from one patient is  
8 shown; two independent patient samples were evaluated.

9

1 Supplemental Figure 2.

2

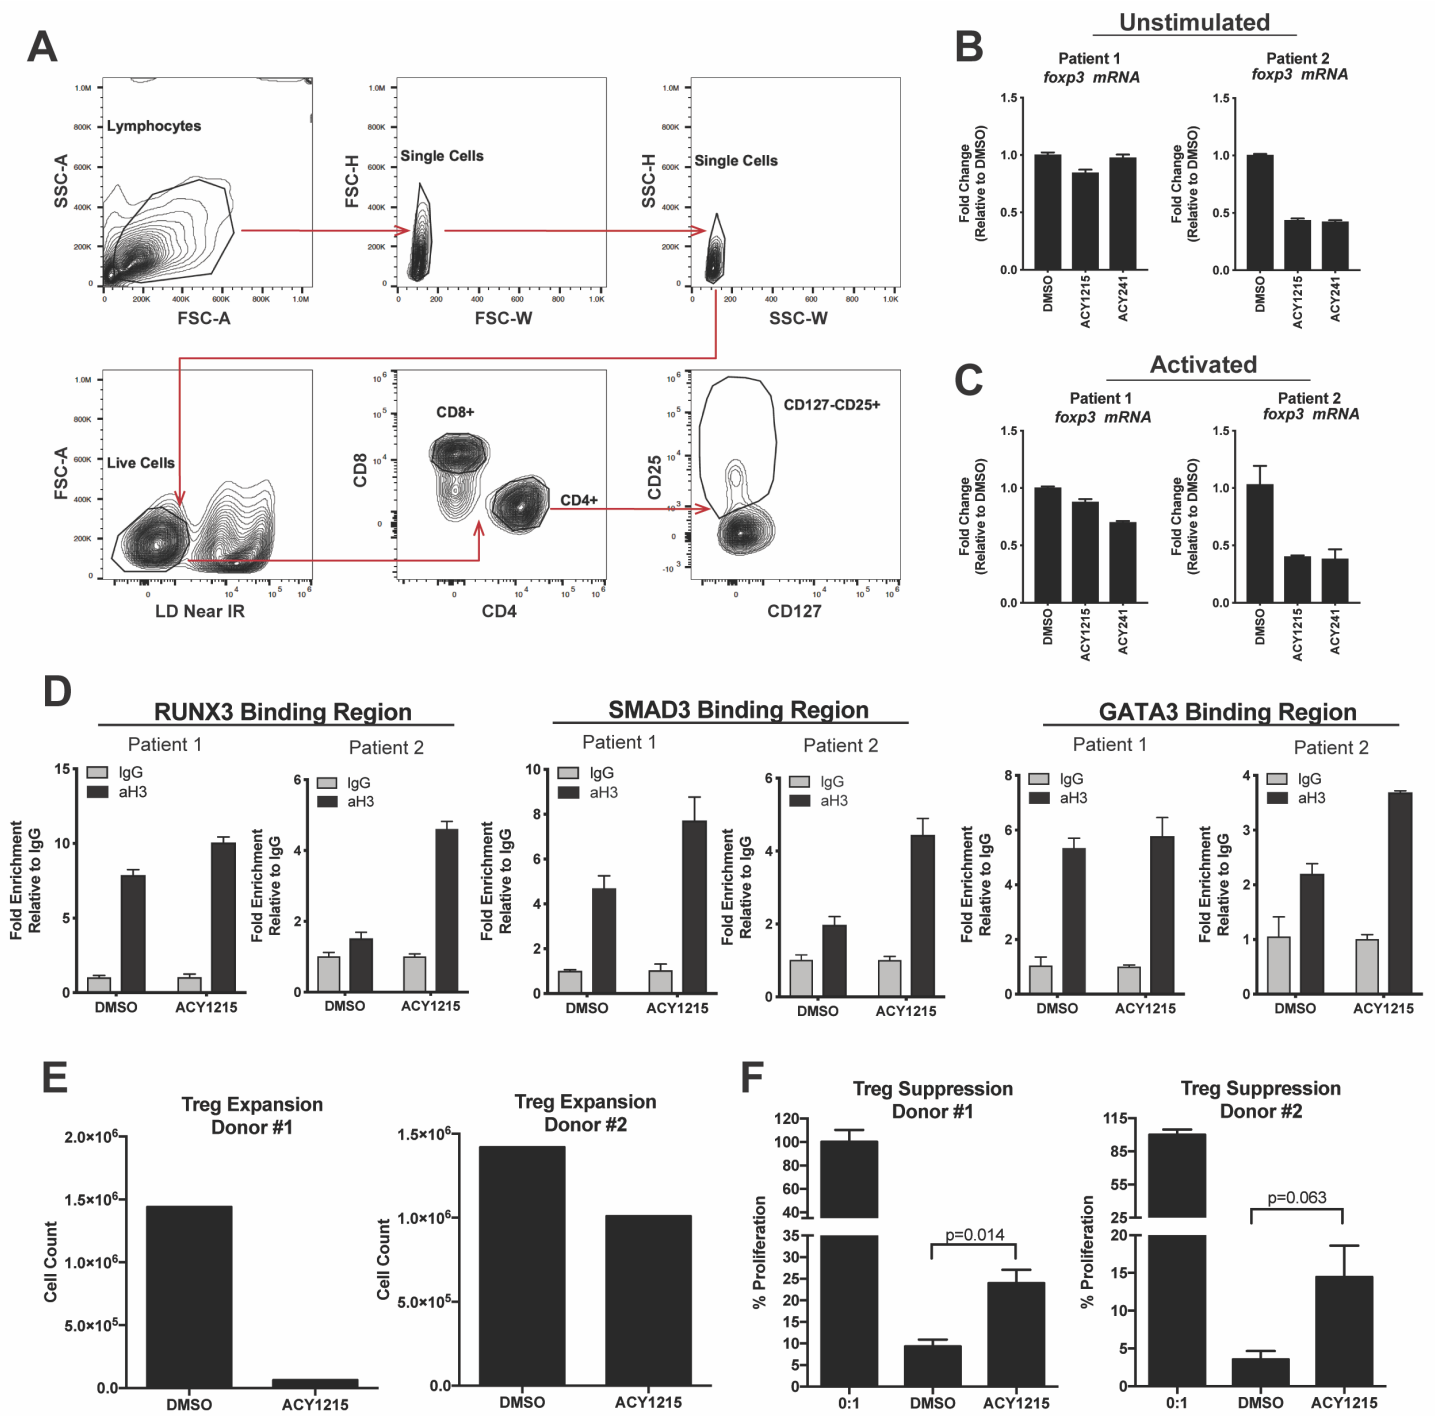

3

4

5 Supplemental Figure 2. Changes in Treg phenotype and function induced by HDAC inhibition. (A) The  
 6 general gating strategy for analysis of Tregs in flow cytometry experiments is shown. (B-C) CD4+ T-cells from  
 7 two melanoma patient samples were treated with DMSO, ACY-1215 500nM or ACY-241 500nM and 100IU/mL  
 8 IL-2 for 24 hours. Cells were left (B) unstimulated or (C) activated, and mRNA *foxp3* expression was assessed

1 by qRT-PCR, as described in Woods DM *et al.*<sup>1</sup> 18S ribosomal RNA was used as reference gene (18S: Fw 5'-  
2 GTAACCCGTTGAACCCCAT-3', Rv 5'-CCATCCA-ATCGGTAGTAGCG-3') and the QuantiTect foxp3 Primer  
3 set (Qiagen; Venlo, Netherlands) was used to determine foxp3 mRNA expression. Error bars are representative  
4 of technical replicates. **(D)** CD3+ T-cells from two melanoma patient samples were treated with DMSO or ACY-  
5 1215 500nM and activated with Dynabeads. Cells were fixed after 24 hours and lysed using the CHIP-IT PBMC  
6 kit (Active Motif; Carlsbad, CA), per manufacturer's instructions. CHIP for acetylated histone 3 (ActiveMotif; aH3,  
7 black bars) and IgG isotype (Abcam; grey bars) were performed as described in Woods DM *et al.*<sup>1</sup> Fold  
8 enrichment over corresponding IgG DNA pulldown at RUNX3, SMAD3 and GATA3 binding regions were  
9 determined by qRT-PCR. Primers sequences were previously described<sup>2</sup> and are as follows: RUNX3\_441 Fw:  
0 5'-GTGGTGAGGGGAAGAAATCATA-3', Rv: 5'-GATGAGTGTGTGCGCTGATAA-3'. CNS1\_SMAD3 Fw: 5'-  
1 AGGTTAAGAGTGTGGGTACTGG-3', Rv: 5'-TGAGGAAATGGAGGTATGGA-3'. CNS2\_GATA3 Fw: 5'-  
2 GGACATCACCTACCACATCC-3', Rv: 5'-ACCACGGAGGAAGAGAAGAG-3'. Error bars are representative of  
3 technical replicates. **(E-F)** CD4+CD127-CD25+ nTregs were isolated from two healthy donor leukapheresis by  
4 magnetic bead purification (Miltenyi Biotec; Bergisch-Gladbach, Germany), as previously described<sup>3</sup>. Monocyte  
5 dendritic cells (moDC) were generated from healthy blood donors using IL-4 (1,000IU/ml) and GM-CSF  
6 (1,000IU/ml). The allogeneic moDC were irradiated (3,000 cGy) and cultured with the nTregs at a ratio of 1:1  
7 for a total of 12 days with ACY-1215 at 500nM or DMSO equivalent. The culture medium was supplemented  
8 with IL-2 (10 IU/ml) and IL-15 (10ng/ml). A limiting dilution analysis was performed on day 0 and day twelve of  
9 culture to determine the frequency of moDC-expanded, antigen-specific nTreg. The frequency was calculated  
0 as previously described<sup>3</sup>. Expanded ACY-1215- or DMSO-treated nTreg were harvested and tested for  
1 suppressive potency in standard mixed lymphocyte reactions. T effectors (CD4+, CD25-) were cultured with  
2 fresh moDCs from the original stimulator at a ratio of 1:10. ACY-1215- or DMSO-treated nTreg (autologous to  
3 the T-effector and allogeneic to the moDCs) were mixed with the cultures at a Treg to T-effector ratio of 1:500.  
4 No additional ACY-1215 or DMSO was added to these cultures. Proliferation was measured by 3H-thymidine  
5 incorporation after 6 days. **(E)** Cell counts of ACY-1215 500nM or DMSO-treated nTregs were assessed twelve  
6 days after expansion. **(F)** Tcons were co-cultured with Tregs previously expanded in DMSO or ACY-1215 for  
7 twelve days and evaluated for proliferation.

1 1 Woods, D. M. *et al.* HDAC Inhibition Upregulates PD-1 Ligands in Melanoma and Augments Immunotherapy  
2 with PD-1 Blockade. *Cancer immunology research* **3**, 1375-1385, doi:10.1158/2326-6066.CIR-15-0077-T  
3 (2015).

4 2 Chakraborty, S. *et al.* Transcriptional regulation of FOXP3 requires integrated activation of both promoter and  
5 CNS regions in tumor-induced CD8(+) Treg cells. *Scientific reports* **7**, 1628, doi:10.1038/s41598-017-01788-z  
6 (2017).

7 3 Veerapathran, A. *et al.* Human regulatory T cells against minor histocompatibility antigens: ex vivo expansion  
8 for prevention of graft-versus-host disease. *Blood* **122**, 2251-2261, doi:10.1182/blood-2013-03-492397 (2013).

9

1 Supplemental Figure 3.

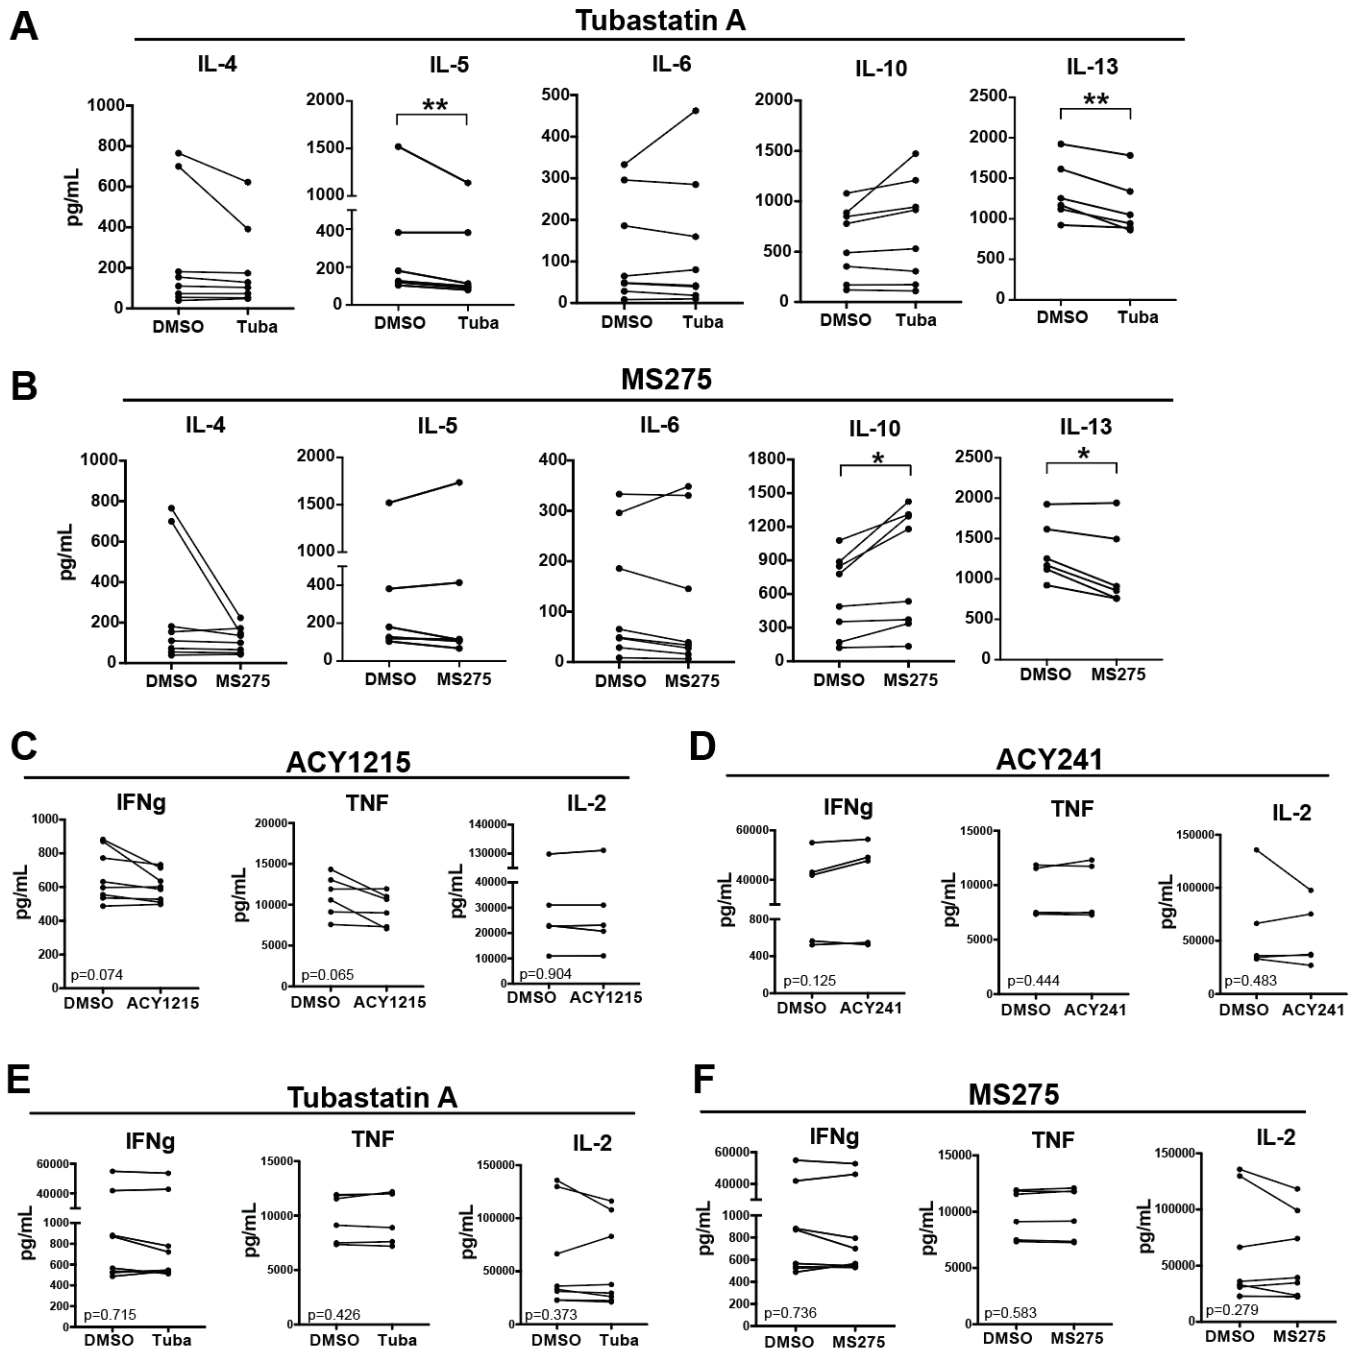

2

3 **Supplemental Figure 3. Effects of HDAC inhibitors on T-cell cytokine production.** CD3<sup>+</sup> T-cells from  
 4 melanoma patient PBMCs were treated with DMSO or HDAC inhibitors and activated for 72 hours. Cytokine  
 5 secretion was assessed by Luminex. Paired analysis of IL-4, IL-5, IL-6, IL-10 and IL-13 production after **(A)**  
 6 Tubastatin A 1 $\mu$ M and **(B)** MS275 125nM treatments are graphed. Paired analysis of IFN $\gamma$ , TNF and IL-2 levels  
 7 after **(C)** ACY-1215 500nM, **(D)** ACY-241 500nM, **(E)** Tubastatin A 1 $\mu$ M and **(F)** MS275 125nM treatments are  
 8 shown. Results are shown for at least six patient samples evaluated over three or more experiments for each  
 9 cytokine and HDACi treatment assessed. Each paired line represents an individual patient sample.

1 Supplemental Figure 4.

2

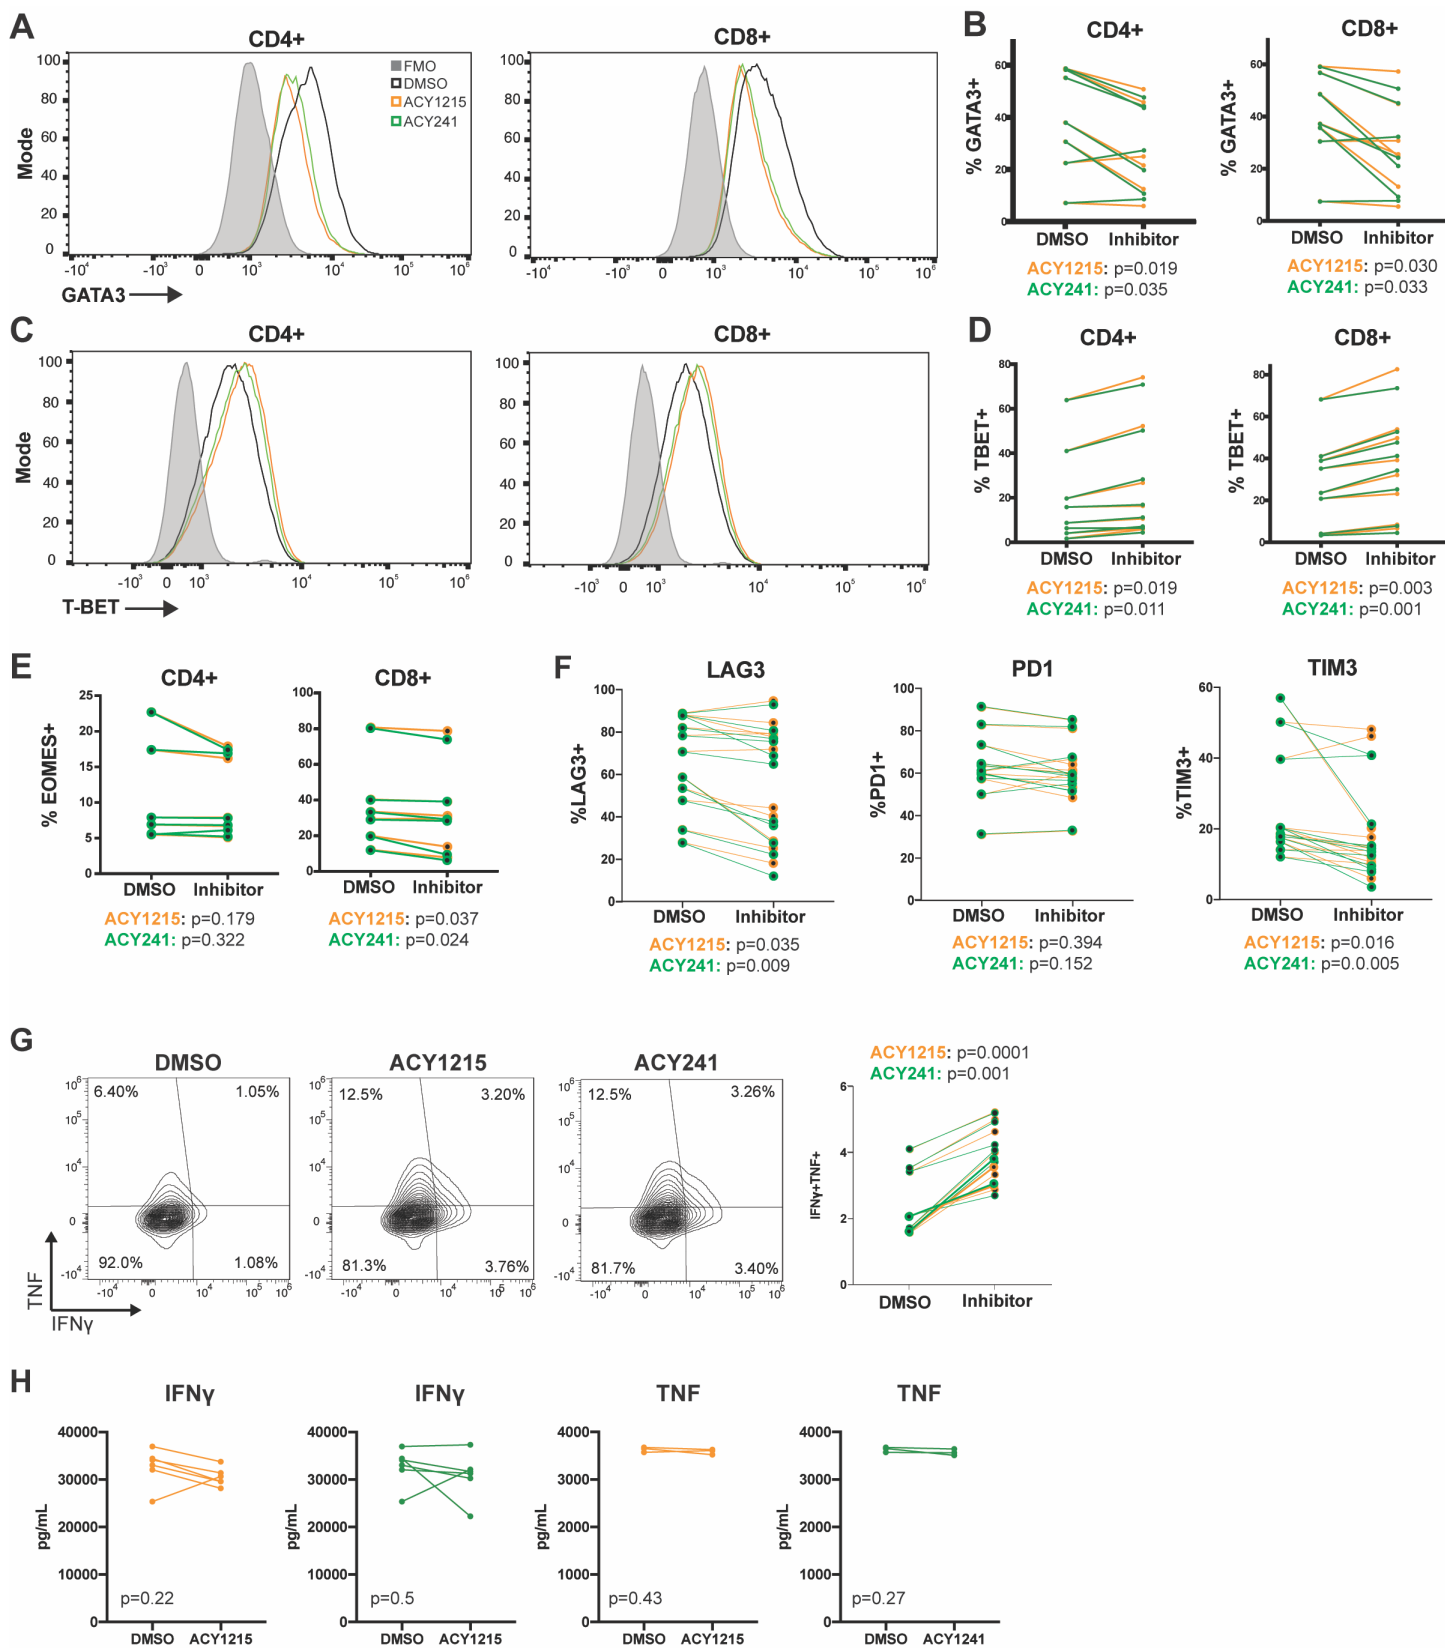

3

4

1 **Supplemental Figure 4. ACY-1215 and ACY-241 Effects on Transcription Factor Expression and T-cell**  
2 **Exhaustion.** T-cells were expanded with 6,000IU/mL IL-2 for one week in the presence of DMSO, ACY-1215  
3 500nM or ACY-241 500nM. Cultures were activated one day prior to flow analysis. Representative histograms  
4 for **(A)** GATA3 and **(C)** T-BET expression in CD4+ and CD8+ T-cells are shown for DMSO (black), ACY-1215  
5 (orange), ACY-241 (green) and fluorescence minus one (FMO) control (grey). CD4+ and CD8+ T-cells  
6 expressing **(B)** GATA3 or **(D)** T-BET in DMSO control and paired inhibitor-treated samples are graphed. **(B, D)**  
7 Results are shown for at least seven patient samples evaluated over three to four experiments for each marker  
8 assessed. Each paired line represents an individual patient sample. **(E)** Paired analysis of EOMES expression  
9 is also shown. Results shown are from six patients evaluated in two to three independent experiments for each  
0 HDACi treatment. **(F)** Paired analysis of CD8+ T-cells expressing LAG3, PD1 or TIM3 are shown for eleven  
1 patients evaluated in three independent experiments. **(G)** Expanded T-cells were activated with  $\alpha$ CD3/CD28  
2 Dynabeads for 24 hours. Representative contour plot from one patient and paired analysis of CD8+ T-cells co-  
3 expressing IFN $\gamma$  and TNF are shown for eight samples evaluated in two independent experiments. **(H)** T-cells  
4 were expanded with 6,000IU/mL IL-2 for one week in the presence of DMSO, ACY-1215 500nM or ACY-241  
5 500nM. Cells were activated with  $\alpha$ CD3/CD28 Dynabeads for additional 72 hours. IFN $\gamma$  and TNF secretion was  
6 assessed by Luminex. Paired analyses are shown for three patient samples assessed for IFN $\gamma$  production and  
7 for six samples evaluated for TNF production across two experiments.

8

1 Supplemental Figure 5.

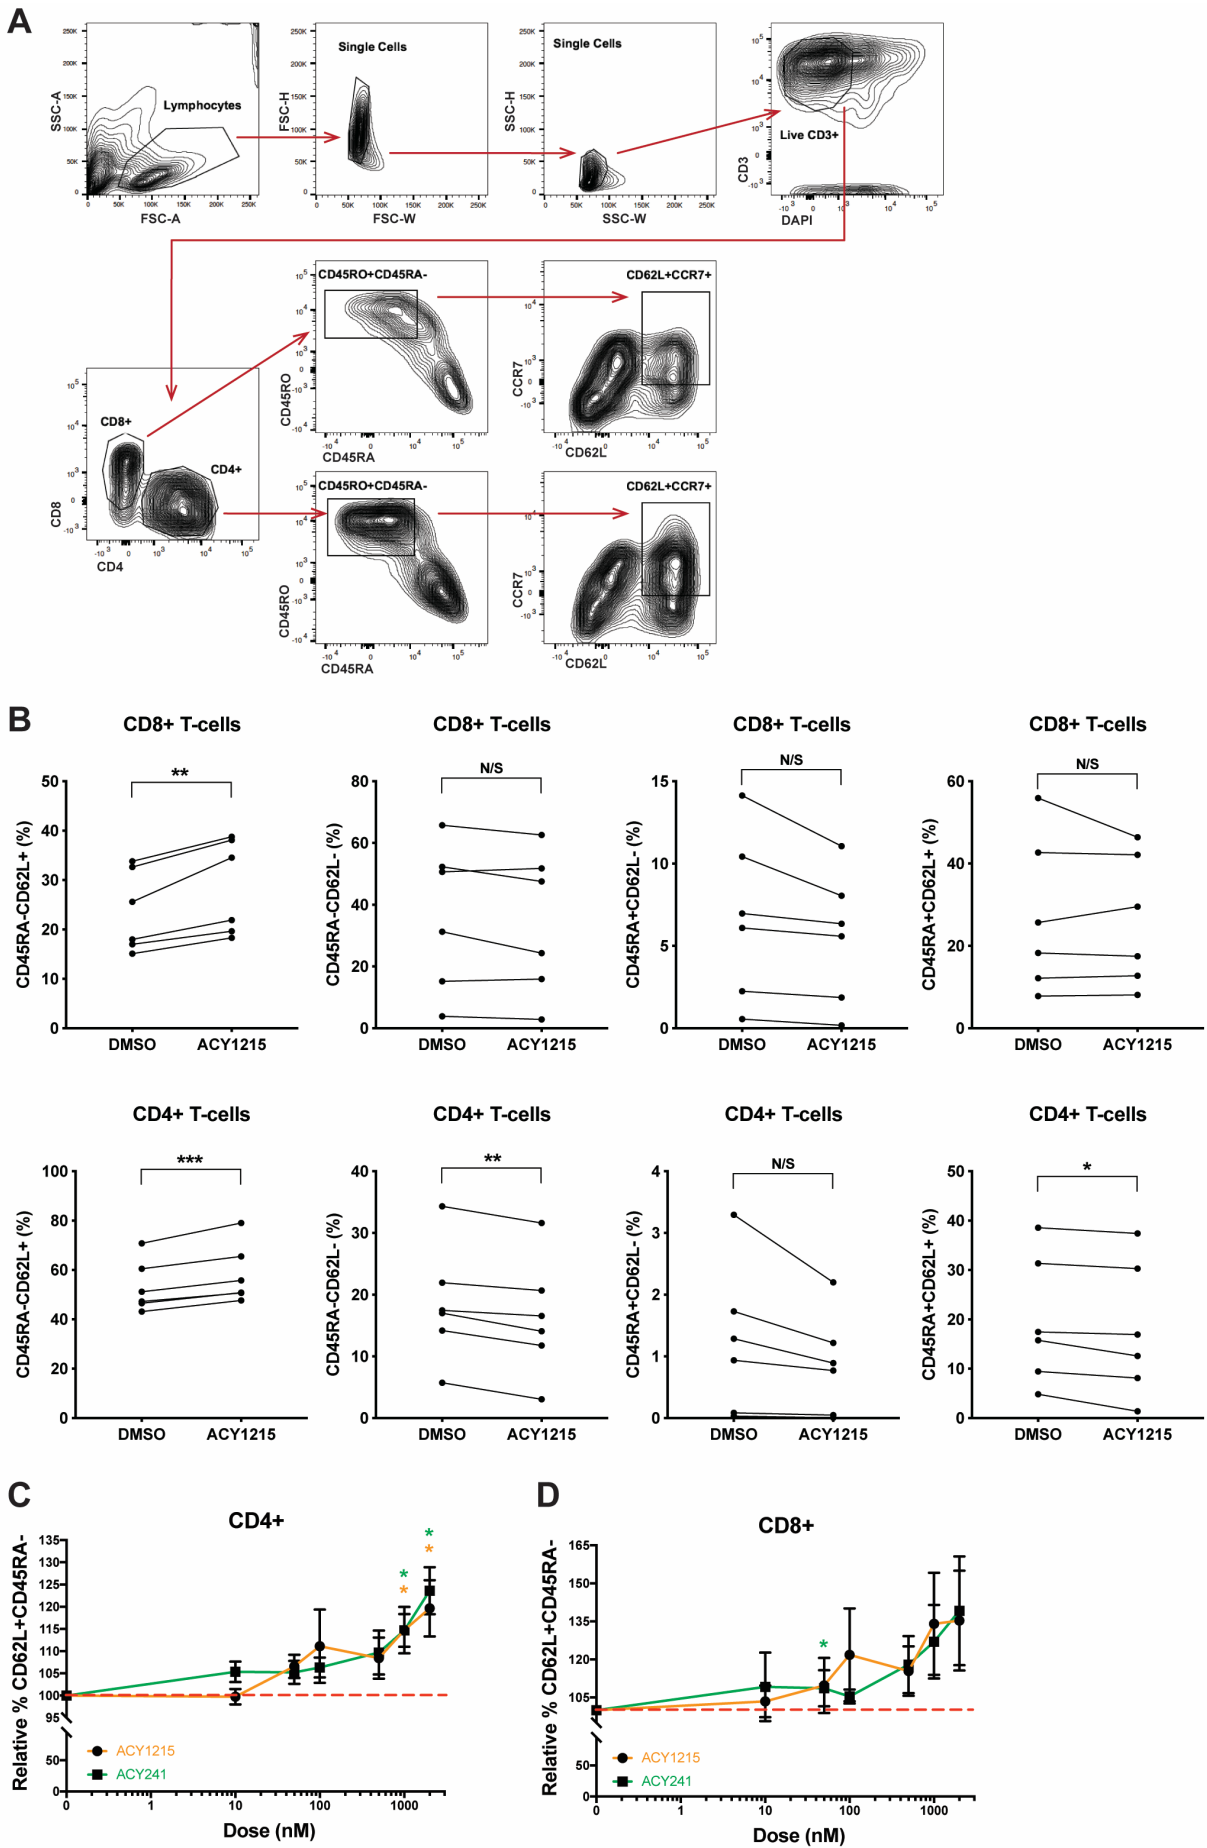



1 **Supplemental Figure 5. Changes in T-cell memory phenotype induced by HDAC inhibition. (A)** The  
2 general gating strategy for analysis of CD45RO+CD45RA-CD62L+CCR7+ T-cell memory phenotype in flow  
3 cytometry experiments is shown. **(B)** T-cells from six melanoma patient PBMC samples were expanded in  
4 6,000IU/mL IL-2 and DMSO or ACY-1215 500nM. Paired analysis for CD45RA-CD62L+ (central memory),  
5 CD45RA-CD62L- (effector memory), CD45RA+CD62L (effector)-, CD45RA+CD62L+ (naïve) are shown for  
6 CD8+ and CD4+ T-cells from six patients. **(C-D)** Melanoma patient T-cells were cultured in 100IU/mL IL-2 with  
7 ACY-1215 (orange lines, circles) or ACY-241 (green lines, squares) for 72 hours. **(C)** CD4+ and **(D)** CD8+ T-  
8 cells were assessed by flow cytometry for percentages of CD62L+CD45RA- central memory cells at the indicated  
9 concentrations. Mean percent central memory ( $\pm$ SEM) relative to DMSO controls of additional three patient  
0 samples assessed is shown on the Y-axis; the dose of inhibitor is indicated on the X-axis. \* $p \leq 0.05$ , \*\* $p \leq 0.01$ ,  
1 \*\*\* $p < 0.001$ .

2

1

2 **Supplemental Figure 6.**

3

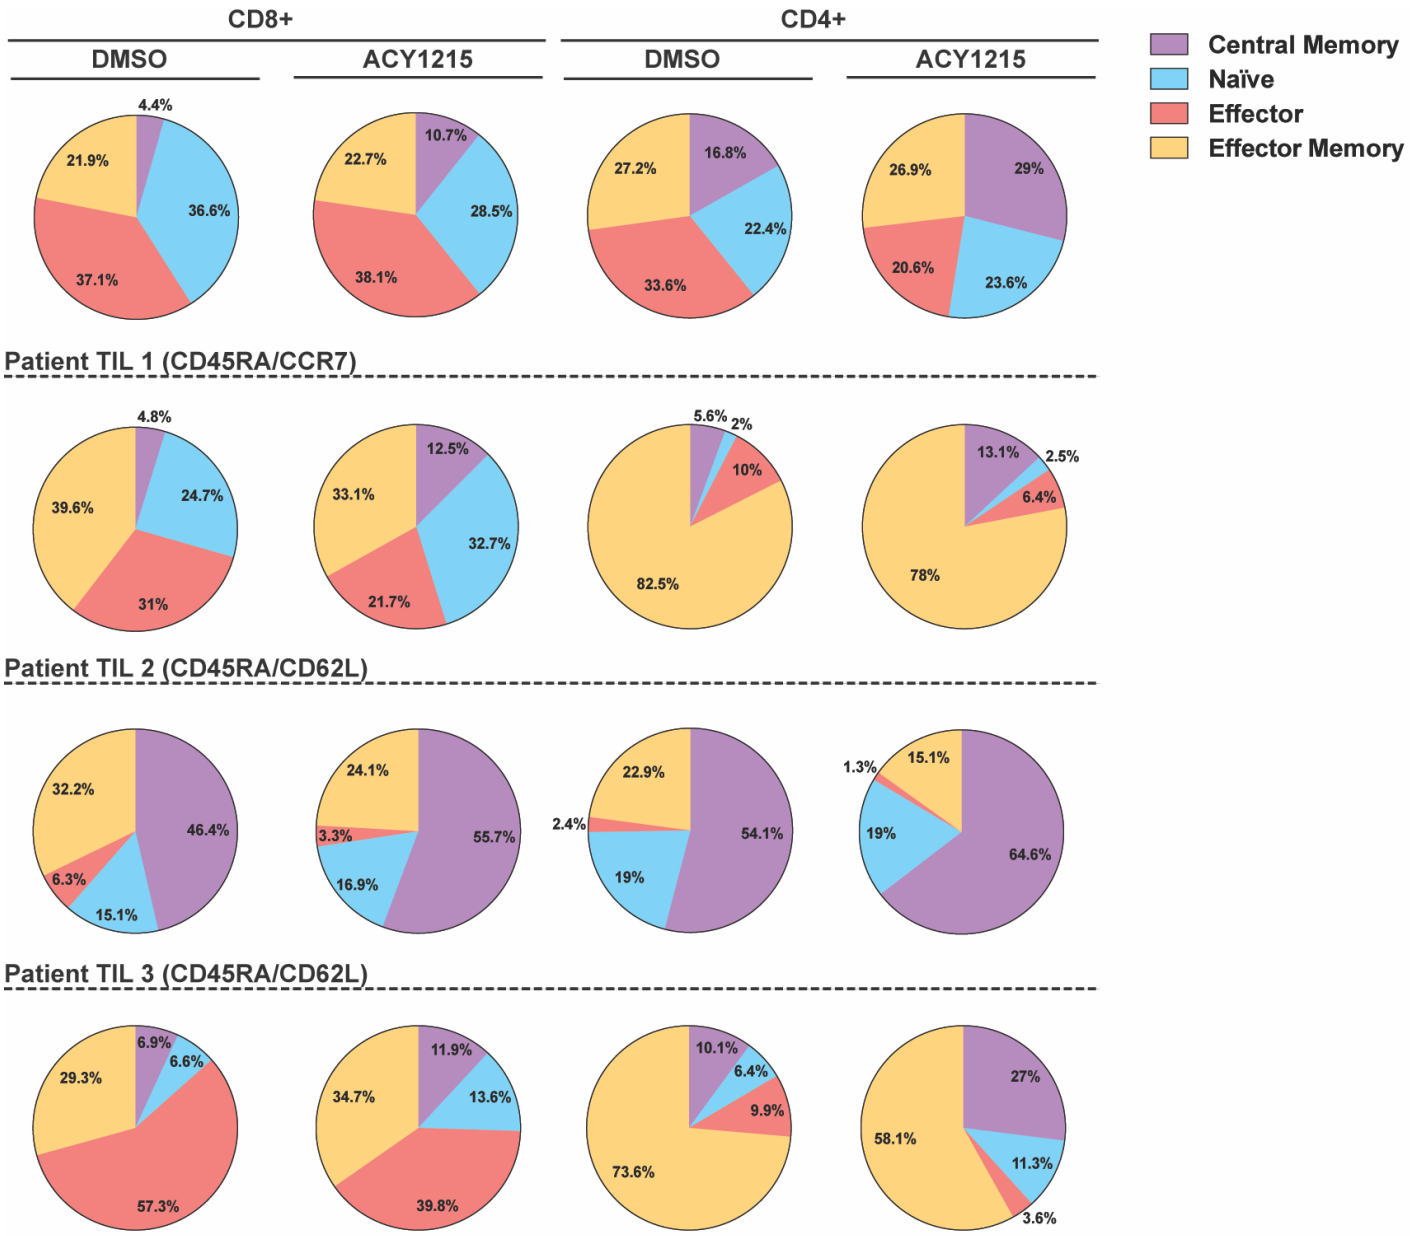

4 **Patient TIL 4 (CD45RO/CD62L)**

5

6 **Supplemental Figure 6. Changes in TIL subsets following expansion with HDAC inhibitors.** Four  
7 melanoma patient-derived TIL samples were expanded across four experiments with 6,000IU/mL IL-2 for one  
8 week in the presence of DMSO or ACY-1215 500nM and assessed for CD8+ (left) and CD4+ (right) subsets.

9

1 Supplemental Figure 7.

2

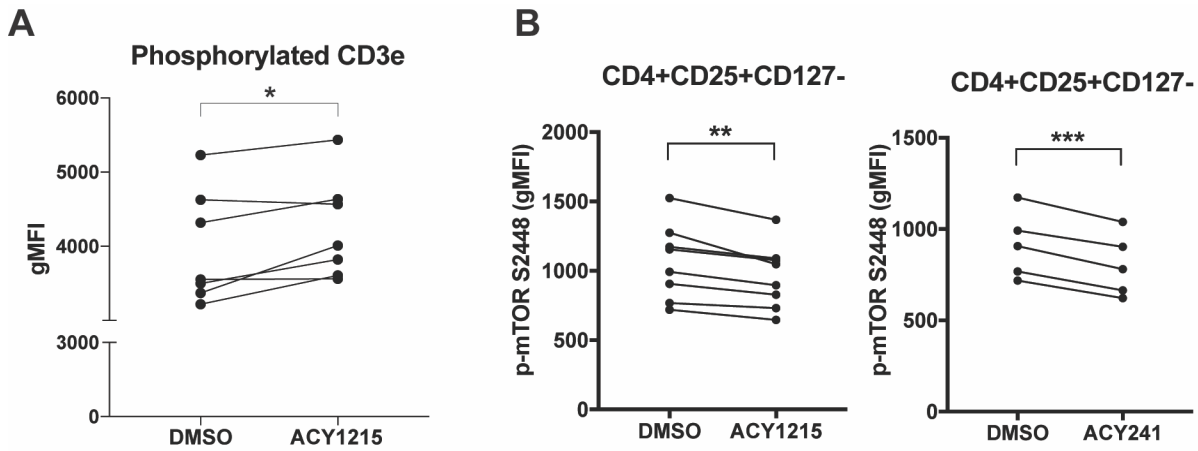

3

4

5 **Supplemental Figure 7. ACY-1215 and ACY-241 effects on T-cell signaling.** T-cells from melanoma patient  
6 PBMC samples were expanded with 6,000IU/mL IL-2 and DMSO, ACY-1215 500nM, or ACY-241 500nM for one  
7 week. **(A)** T-cells were activated for 24 hours and evaluated for CD3ε phosphorylation by Luminex. Paired  
8 analyses of seven samples assessed over three experiments are shown. **(B)** Non-activated T-cells were  
9 evaluated by flow cytometry for phosphorylation of mTOR S2448 in CD4+CD127-CD25+ Tregs. Geometric mean  
0 fluorescence (gMFI) is graphed for at least five patient samples assessed in two experiments. \*p<0.05, \*\*p<0.01,  
1 \*\*\*p<0.001.
